# Supplementary material for: Extraction of ultratrace dissolved gaseous mercury and reactive mercury in natural freshwater for stable isotope analysis
Source: Royal Society of Chemistry journal article supplement (doi:10.1039/d1ja00212k), 2021-01-01
Supplement: d1ja00212k1.pdf [file d1ja00212k1.pdf]

Supporting information :

**Extraction of ultratrace dissolved gaseous mercury and reactive mercury in natural  
freshwater for stable isotope analysis**

Hui Zhang<sup>1,2</sup>, Xian Wu<sup>1,2</sup>, Qianwen Deng<sup>1,2</sup>, Leiming Zhang<sup>3</sup>, Xuewu Fu<sup>1,4,\*</sup>, Xinbin Feng<sup>1,4</sup>

<sup>1</sup> State Key Laboratory of Environmental Geochemistry, Institute of Geochemistry, Chinese Academy of  
Sciences, Guiyang 550081, China.

<sup>2</sup> University Chinese Academy of Sciences, Beijing 100049, China.

<sup>3</sup> Air Quality Research Division, Science and Technology Branch, Environment and Climate Change Canada,  
Toronto, Ontario, Canada

<sup>4</sup> CAS Center for Excellence in Quaternary Science and Global Change, Xi'an, 710061, China

Correspondence to: Xuewu Fu, [fuxuewu@mail.gyig.ac.cn](mailto:fuxuewu@mail.gyig.ac.cn)

|               |        |               |        |
|---------------|--------|---------------|--------|
| Table S1..... | Page 1 | Table S2..... | Page 2 |
| Table S3..... | Page 3 | Table S4..... | Page 4 |
| Text S1.....  | Page 5 |               |        |

**Number of Tables: 4**

**Number of pages: 6**

**Table S1** Recoveries and isotopic compositions of the injected and extracted Hg(0) for the DGM standard addition tests.

| Sample ID          | Temperature | Recovery | $\delta^{202}\text{Hg}$ | 2sd  | $\delta^{201}\text{Hg}$ | 2sd  | $\delta^{200}\text{Hg}$ | 2sd  | $\delta^{199}\text{Hg}$ | 2sd  | $\Delta^{201}\text{Hg}$ | 2sd  | $\Delta^{200}\text{Hg}$ | 2sd  | $\Delta^{199}\text{Hg}$ | 2sd  |
|--------------------|-------------|----------|-------------------------|------|-------------------------|------|-------------------------|------|-------------------------|------|-------------------------|------|-------------------------|------|-------------------------|------|
|                    | °C          | %        | (‰)                     |      | (‰)                     |      | (‰)                     |      | (‰)                     |      | (‰)                     |      | (‰)                     |      | (‰)                     |      |
| Injected-Hg(0)-1   | 13.8        | 93.0     | -1.79                   | 0.15 | -1.33                   | 0.06 | -0.96                   | 0.05 | -0.35                   | 0.05 | 0.02                    | 0.09 | -0.06                   | 0.06 | 0.10                    | 0.05 |
| Extracted-Hg(0)-1  |             | 108.1    | -2.00                   | 0.15 | -1.44                   | 0.06 | -0.96                   | 0.05 | -0.35                   | 0.05 | 0.06                    | 0.09 | 0.04                    | 0.06 | 0.17                    | 0.05 |
| Injected-Hg(0)-2   | 13.7        | 96.2     | -2.06                   | 0.12 | -1.48                   | 0.11 | -1.03                   | 0.10 | -0.31                   | 0.07 | 0.08                    | 0.06 | 0.01                    | 0.06 | 0.21                    | 0.05 |
| Extracted-Hg(0)-2  |             | 99.2     | -1.97                   | 0.12 | -1.40                   | 0.11 | -0.96                   | 0.10 | -0.33                   | 0.07 | 0.09                    | 0.06 | 0.03                    | 0.06 | 0.17                    | 0.05 |
| Injected-Hg(0)-3   | 15.7        | 86.3     | -1.61                   | 0.13 | -1.22                   | 0.06 | -0.82                   | 0.09 | -0.34                   | 0.05 | 0.00                    | 0.06 | -0.01                   | 0.06 | 0.07                    | 0.05 |
| Extracted-Hg(0)-3  |             | 102.2    | -1.61                   | 0.13 | -1.18                   | 0.06 | -0.82                   | 0.09 | -0.30                   | 0.05 | 0.03                    | 0.06 | -0.01                   | 0.06 | 0.10                    | 0.05 |
| Injected-Hg(0)-4   | 15.7        | 100.0    | -1.77                   | 0.10 | -1.28                   | 0.06 | -0.85                   | 0.06 | -0.21                   | 0.05 | 0.05                    | 0.06 | 0.04                    | 0.06 | 0.23                    | 0.05 |
| Extracted-Hg(0)-4  |             | 98.5     | -1.63                   | 0.10 | -1.16                   | 0.06 | -0.77                   | 0.06 | -0.24                   | 0.05 | 0.07                    | 0.06 | 0.04                    | 0.06 | 0.17                    | 0.05 |
| Injected-Hg(0)-5   | 16.3        | 101.4    | -1.64                   | 0.10 | -1.16                   | 0.06 | -0.77                   | 0.05 | -0.22                   | 0.05 | 0.07                    | 0.09 | 0.05                    | 0.06 | 0.19                    | 0.05 |
| Extracted-Hg(0)-5  |             | 100.6    | -1.37                   | 0.10 | -1.00                   | 0.06 | -0.68                   | 0.05 | -0.22                   | 0.05 | 0.03                    | 0.09 | 0.01                    | 0.06 | 0.13                    | 0.05 |
| Injected-Hg(0)-6   | 21.0        | 84.1     | -1.79                   | 0.22 | -1.25                   | 0.14 | -0.87                   | 0.12 | -0.26                   | 0.05 | 0.10                    | 0.06 | 0.03                    | 0.06 | 0.19                    | 0.05 |
| Extracted-Hg(0)-6  |             | 85.1     | -1.71                   | 0.22 | -1.24                   | 0.14 | -0.82                   | 0.12 | -0.27                   | 0.05 | 0.05                    | 0.06 | 0.04                    | 0.06 | 0.16                    | 0.05 |
| Injected-Hg(0)-7   | 15.1        | 86.6     | -1.83                   | 0.10 | -1.26                   | 0.06 | -0.91                   | 0.05 | -0.32                   | 0.05 | 0.12                    | 0.06 | 0.01                    | 0.06 | 0.14                    | 0.05 |
| Extracted-Hg(0)-7  |             | 115.9    | -1.52                   | 0.10 | -1.07                   | 0.06 | -0.79                   | 0.05 | -0.25                   | 0.05 | 0.07                    | 0.06 | -0.03                   | 0.06 | 0.14                    | 0.05 |
| Injected-Hg(0)-8   | 13.7        | 93.6     | -2.22                   | 0.10 | -1.58                   | 0.10 | -1.10                   | 0.08 | -0.40                   | 0.08 | 0.09                    | 0.06 | 0.02                    | 0.06 | 0.16                    | 0.06 |
| Extracted-Hg(0)-8  |             | 87.1     | -2.08                   | 0.10 | -1.50                   | 0.10 | -1.06                   | 0.08 | -0.43                   | 0.08 | 0.07                    | 0.06 | -0.01                   | 0.06 | 0.10                    | 0.06 |
| Injected-Hg(0)-9   | 14.1        | 95.2     | -1.36                   | 0.10 | -0.89                   | 0.10 | -0.65                   | 0.08 | -0.17                   | 0.08 | 0.13                    | 0.06 | 0.03                    | 0.06 | 0.17                    | 0.06 |
| Extracted-Hg(0)-9  |             | 98.4     | -1.75                   | 0.10 | -1.27                   | 0.06 | -0.85                   | 0.05 | -0.24                   | 0.05 | 0.05                    | 0.06 | 0.03                    | 0.06 | 0.20                    | 0.05 |
| Injected-Hg(0)-10  | 17.4        | 107.2    | -1.88                   | 0.10 | -1.34                   | 0.06 | -0.90                   | 0.05 | -0.34                   | 0.05 | 0.08                    | 0.08 | 0.04                    | 0.04 | 0.13                    | 0.05 |
| Extracted-Hg(0)-10 |             | 93.0     | -1.86                   | 0.10 | -1.34                   | 0.06 | -0.90                   | 0.05 | -0.36                   | 0.05 | 0.05                    | 0.07 | 0.03                    | 0.06 | 0.11                    | 0.05 |
| Injected-Hg(0)-11  | 15.7        | 83.2     | -1.78                   | 0.16 | -1.25                   | 0.22 | -0.84                   | 0.07 | -0.28                   | 0.05 | 0.09                    | 0.10 | 0.05                    | 0.06 | 0.17                    | 0.05 |
| Extracted-Hg(0)-11 |             | 97.5     | -1.64                   | 0.16 | -1.16                   | 0.22 | -0.75                   | 0.07 | -0.24                   | 0.05 | 0.07                    | 0.10 | 0.08                    | 0.06 | 0.17                    | 0.05 |
| Injected-Hg(0)-12  | 14.5        | 90.1     | -1.85                   | 0.10 | -1.28                   | 0.13 | -0.85                   | 0.05 | -0.27                   | 0.05 | 0.12                    | 0.08 | 0.07                    | 0.06 | 0.19                    | 0.05 |
| Extracted-Hg(0)-12 |             | 88.5     | -1.78                   | 0.10 | -1.32                   | 0.06 | -0.91                   | 0.05 | -0.34                   | 0.05 | 0.02                    | 0.05 | -0.04                   | 0.06 | 0.11                    | 0.05 |
| Injected-Hg(0)-13  | 21.0        | 106.0    | -1.50                   | 0.10 | -1.02                   | 0.03 | -0.74                   | 0.07 | -0.23                   | 0.05 | 0.11                    | 0.06 | 0.01                    | 0.06 | 0.15                    | 0.05 |
| Extracted-Hg(0)-13 |             | 98.0     | -1.55                   | 0.10 | -1.12                   | 0.06 | -0.67                   | 0.10 | -0.17                   | 0.08 | 0.05                    | 0.06 | 0.11                    | 0.08 | 0.22                    | 0.07 |
| Injected-Hg(0)-14  | 21.6        | 100.5    | -1.32                   | 0.10 | -0.96                   | 0.07 | -0.65                   | 0.10 | -0.17                   | 0.08 | 0.03                    | 0.06 | 0.02                    | 0.08 | 0.16                    | 0.07 |
| Extracted-Hg(0)-14 |             | 101.0    | -1.64                   | 0.10 | -1.11                   | 0.05 | -0.78                   | 0.07 | -0.23                   | 0.08 | 0.12                    | 0.06 | 0.04                    | 0.06 | 0.19                    | 0.08 |

**Table S2** Recoveies and isotopic compositions of spiked SRM 3133, RM 8610 and BCR 482 for the RHg standard addition test.

| Sample ID | Hg   | Recovery | $\delta^{204}\text{Hg}$ | 2sd  | $\delta^{202}\text{Hg}$ | 2sd  | $\delta^{201}\text{Hg}$ | 2sd  | $\delta^{200}\text{Hg}$ | 2sd  | $\delta^{199}\text{Hg}$ | 2sd  | $\Delta^{204}\text{Hg}$ | 2sd  | $\Delta^{201}\text{Hg}$ | 2sd  | $\Delta^{200}\text{Hg}$ | 2sd  | $\Delta^{199}\text{Hg}$ | 2sd  |
|-----------|------|----------|-------------------------|------|-------------------------|------|-------------------------|------|-------------------------|------|-------------------------|------|-------------------------|------|-------------------------|------|-------------------------|------|-------------------------|------|
|           | ng   | %        |                         |      | (‰)                     |      | (‰)                     |      | (‰)                     |      | (‰)                     |      |                         |      | (‰)                     |      | (‰)                     |      | (‰)                     |      |
| 3133-1    | 10ng | 91.4     |                         |      | -0.27                   | 0.22 | -0.31                   | 0.06 | -0.22                   | 0.05 | -0.07                   | 0.06 |                         |      | -0.11                   | 0.06 | -0.09                   | 0.08 | -0.01                   | 0.05 |
| 3133-2    |      | 106.5    |                         |      | -0.14                   | 0.22 | -0.10                   | 0.08 | -0.07                   | 0.08 | -0.02                   | 0.07 |                         |      | 0.01                    | 0.06 | 0.01                    | 0.08 | 0.02                    | 0.08 |
| 3133-3    |      | 93.5     |                         |      | -0.01                   | 0.22 | -0.06                   | 0.06 | -0.05                   | 0.05 | 0.01                    | 0.05 |                         |      | -0.05                   | 0.06 | -0.04                   | 0.08 | 0.01                    | 0.05 |
| 3133-4    |      | 110.2    |                         |      | -0.19                   | 0.22 | -0.10                   | 0.06 | -0.07                   | 0.05 | 0.01                    | 0.05 |                         |      | 0.04                    | 0.06 | 0.02                    | 0.08 | 0.06                    | 0.05 |
| 3133-5    |      | 94.8     |                         |      | -0.08                   | 0.22 | -0.04                   | 0.06 | 0.04                    | 0.05 | 0.02                    | 0.05 |                         |      | 0.02                    | 0.06 | 0.08                    | 0.08 | 0.04                    | 0.05 |
| 3133-6    |      | 81.3     |                         |      | 0.12                    | 0.22 | -0.14                   | 0.06 | 0.05                    | 0.05 | 0.03                    | 0.05 |                         |      | 0.05                    | 0.06 | -0.01                   | 0.08 | 0.00                    | 0.05 |
| 3133-7    |      | 94.6     |                         |      | -0.22                   | 0.22 | -0.11                   | 0.06 | -0.08                   | 0.05 | -0.01                   | 0.07 |                         |      | 0.05                    | 0.06 | 0.03                    | 0.08 | 0.05                    | 0.06 |
| 3133-8    |      | 90.7     |                         |      | -0.19                   | 0.22 | -0.08                   | 0.06 | -0.06                   | 0.05 | 0.01                    | 0.07 |                         |      | 0.06                    | 0.06 | 0.04                    | 0.08 | 0.06                    | 0.06 |
| 3133-9    |      | 103.8    |                         |      | -0.19                   | 0.22 | -0.06                   | 0.06 | -0.05                   | 0.05 | 0.01                    | 0.05 |                         |      | 0.09                    | 0.06 | 0.05                    | 0.08 | 0.06                    | 0.05 |
| 3133-10   |      | 92.7     |                         |      | 0.04                    | 0.22 | 0.06                    | 0.06 | 0.04                    | 0.05 | 0.05                    | 0.05 |                         |      | 0.03                    | 0.06 | 0.02                    | 0.08 | 0.04                    | 0.05 |
| 3133-11   |      | 92.0     |                         |      | -0.25                   | 0.22 | -0.16                   | 0.06 | -0.12                   | 0.07 | -0.04                   | 0.05 |                         |      | 0.03                    | 0.06 | 0.01                    | 0.08 | 0.02                    | 0.05 |
| 3133-12   |      | 100.0    |                         |      | -0.05                   | 0.22 | -0.01                   | 0.06 | 0.06                    | 0.05 | 0.00                    | 0.05 |                         |      | 0.03                    | 0.06 | 0.08                    | 0.08 | 0.01                    | 0.05 |
| 3133-13   |      | 104.0    |                         |      | -0.05                   | 0.22 | 0.09                    | 0.06 | -0.01                   | 0.12 | 0.04                    | 0.05 |                         |      | 0.12                    | 0.06 | 0.01                    | 0.08 | 0.05                    | 0.05 |
| 3133-14   |      | 117.0    |                         |      | -0.12                   | 0.22 | -0.11                   | 0.07 | -0.04                   | 0.05 | 0.02                    | 0.05 |                         |      | -0.01                   | 0.06 | 0.02                    | 0.08 | 0.05                    | 0.06 |
| 3133-15   |      | 122.0    |                         |      | -0.17                   | 0.22 | -0.13                   | 0.06 | -0.08                   | 0.05 | -0.06                   | 0.05 |                         |      | 0.00                    | 0.06 | 0.01                    | 0.08 | -0.02                   | 0.05 |
| 8610-1    | 5ng  | 95.2     | -0.62                   | 0.16 | -0.47                   | 0.13 | -0.35                   | 0.09 | -0.19                   | 0.10 | -0.16                   | 0.08 | 0.08                    | 0.14 | 0.00                    | 0.06 | 0.04                    | 0.06 | -0.04                   | 0.05 |
| 8610-2    |      | 102.2    | -0.58                   | 0.16 | -0.44                   | 0.13 | -0.36                   | 0.09 | -0.20                   | 0.10 | -0.13                   | 0.08 | 0.08                    | 0.14 | -0.03                   | 0.06 | 0.03                    | 0.06 | -0.02                   | 0.05 |
| 8610-3    |      | 99.2     | -0.62                   | 0.16 | -0.44                   | 0.13 | -0.36                   | 0.09 | -0.22                   | 0.10 | -0.13                   | 0.08 | 0.03                    | 0.14 | -0.04                   | 0.06 | 0.00                    | 0.06 | -0.02                   | 0.05 |
| 8610-4    | 10ng | 90.1     | -0.74                   | 0.16 | -0.50                   | 0.13 | -0.46                   | 0.09 | -0.27                   | 0.10 | -0.16                   | 0.08 | 0.01                    | 0.14 | -0.08                   | 0.06 | -0.01                   | 0.06 | -0.04                   | 0.05 |
| 8610-5    |      | 90.2     | -0.72                   | 0.16 | -0.59                   | 0.13 | -0.42                   | 0.09 | -0.33                   | 0.10 | -0.21                   | 0.08 | 0.17                    | 0.14 | 0.03                    | 0.06 | -0.03                   | 0.06 | -0.06                   | 0.05 |
| 8610-6    |      | 90.0     | -0.54                   | 0.16 | -0.38                   | 0.13 | -0.33                   | 0.09 | -0.18                   | 0.10 | -0.10                   | 0.08 | 0.03                    | 0.14 | -0.04                   | 0.06 | 0.01                    | 0.06 | 0.00                    | 0.05 |
| 8610-7    | 20ng | 110.3    | -0.54                   | 0.16 | -0.38                   | 0.13 | -0.31                   | 0.09 | -0.18                   | 0.10 | -0.08                   | 0.08 | 0.02                    | 0.14 | -0.03                   | 0.06 | 0.01                    | 0.06 | 0.01                    | 0.05 |
| 8610-8    |      | 96.2     | -0.72                   | 0.16 | -0.43                   | 0.13 | -0.38                   | 0.09 | -0.24                   | 0.10 | -0.11                   | 0.08 | -0.07                   | 0.14 | -0.05                   | 0.06 | -0.02                   | 0.06 | 0.00                    | 0.05 |
| 8610-9    |      | 102.3    | -0.71                   | 0.16 | -0.46                   | 0.13 | -0.35                   | 0.09 | -0.26                   | 0.10 | -0.14                   | 0.08 | -0.02                   | 0.14 | 0.00                    | 0.06 | -0.03                   | 0.06 | -0.03                   | 0.05 |
| BCR-1     | 5ng  | 99.6     | -2.67                   | 0.24 | -1.70                   | 0.14 | -1.96                   | 0.14 | -0.81                   | 0.08 | -1.08                   | 0.09 | -0.14                   | 0.14 | -0.68                   | 0.05 | 0.05                    | 0.06 | -0.65                   | 0.07 |
| BCR-2     |      | 112.6    | -2.68                   | 0.24 | -1.71                   | 0.14 | -1.95                   | 0.14 | -0.82                   | 0.08 | -1.12                   | 0.09 | -0.12                   | 0.11 | -0.66                   | 0.05 | 0.05                    | 0.06 | -0.69                   | 0.07 |
| BCR-3     |      | 99.6     | -2.64                   | 0.24 | -1.69                   | 0.14 | -1.93                   | 0.14 | -0.82                   | 0.08 | -1.06                   | 0.09 | -0.11                   | 0.11 | -0.65                   | 0.09 | 0.03                    | 0.06 | -0.63                   | 0.07 |
| BCR-4     | 10ng | 90.7     | -2.35                   | 0.24 | -1.52                   | 0.14 | -1.75                   | 0.14 | -0.69                   | 0.08 | -0.95                   | 0.09 | -0.08                   | 0.11 | -0.61                   | 0.08 | 0.07                    | 0.06 | -0.57                   | 0.07 |
| BCR-5     |      | 89.7     | -2.73                   | 0.24 | -1.76                   | 0.14 | -1.95                   | 0.14 | -0.82                   | 0.08 | -1.04                   | 0.09 | -0.10                   | 0.11 | -0.63                   | 0.08 | 0.06                    | 0.06 | -0.60                   | 0.07 |
| BCR-6     |      | 100.6    | -2.57                   | 0.24 | -1.61                   | 0.14 | -1.86                   | 0.14 | -0.77                   | 0.08 | -1.07                   | 0.09 | -0.16                   | 0.11 | -0.64                   | 0.08 | 0.04                    | 0.06 | -0.66                   | 0.07 |
| BCR-7     | 20ng | 98.6     | -2.49                   | 0.24 | -1.61                   | 0.14 | -1.86                   | 0.14 | -0.78                   | 0.08 | -1.04                   | 0.09 | -0.09                   | 0.11 | -0.64                   | 0.05 | 0.03                    | 0.06 | -0.63                   | 0.07 |
| BCR-8     |      | 95.7     | -2.68                   | 0.24 | -1.68                   | 0.14 | -1.90                   | 0.14 | -0.78                   | 0.08 | -1.05                   | 0.09 | -0.18                   | 0.11 | -0.64                   | 0.05 | 0.06                    | 0.06 | -0.63                   | 0.07 |
| BCR-9     |      | 98.3     | -2.63                   | 0.24 | -1.63                   | 0.14 | -1.82                   | 0.14 | -0.78                   | 0.08 | -1.03                   | 0.09 | -0.20                   | 0.11 | -0.60                   | 0.05 | 0.04                    | 0.06 | -0.62                   | 0.07 |

**Table S3** Concentrations and isotopic compositions of DGM and RHg for the duplicate samples. Samples were collected in HFL.

| Sample ID | Hg concentration   | $\delta^{199}\text{Hg}$ | 2sd  | $\delta^{200}\text{Hg}$ | 2sd  | $\delta^{201}\text{Hg}$ | 2sd  | $\delta^{202}\text{Hg}$ | 2sd  | $\delta^{204}\text{Hg}$ | 2sd  | $\Delta^{199}\text{Hg}$ | 2sd  | $\Delta^{200}\text{Hg}$ | 2sd  | $\Delta^{201}\text{Hg}$ | 2sd  | $\Delta^{204}\text{Hg}$ | 2sd  |
|-----------|--------------------|-------------------------|------|-------------------------|------|-------------------------|------|-------------------------|------|-------------------------|------|-------------------------|------|-------------------------|------|-------------------------|------|-------------------------|------|
|           | pg L <sup>-1</sup> | (‰)                     |      | (‰)                     |      | (‰)                     |      | (‰)                     |      | (‰)                     |      | (‰)                     |      | (‰)                     |      | (‰)                     |      | (‰)                     |      |
| DGM-a-1   | 74.6               | -0.13                   | 0.05 | -0.22                   | 0.06 | -0.32                   | 0.11 | -0.36                   | 0.12 | -0.54                   | 0.29 | -0.04                   | 0.05 | -0.05                   | 0.06 | -0.04                   | 0.05 | 0.00                    | 0.29 |
| DGM-b-1   | 82.6               | -0.21                   | 0.05 | -0.34                   | 0.13 | -0.49                   | 0.29 | -0.56                   | 0.24 | -0.95                   | 0.44 | -0.07                   | 0.05 | -0.06                   | 0.06 | -0.07                   | 0.05 | -0.11                   | 0.29 |
| DGM-a-2   | 109.2              | -0.10                   | 0.09 | -0.21                   | 0.12 | -0.28                   | 0.11 | -0.46                   | 0.12 | -0.59                   | 0.57 | 0.01                    | 0.08 | 0.02                    | 0.09 | 0.06                    | 0.09 | 0.10                    | 0.48 |
| DGM-b-2   | 110.0              | -0.10                   | 0.08 | -0.21                   | 0.12 | -0.35                   | 0.11 | -0.53                   | 0.12 | -0.73                   | 0.48 | 0.04                    | 0.08 | 0.06                    | 0.09 | 0.05                    | 0.09 | 0.07                    | 0.49 |
| DGM-a-3   | 125.7              | -0.07                   | 0.12 | -0.23                   | 0.09 | -0.39                   | 0.11 | -0.56                   | 0.12 | -0.90                   | 0.41 | 0.07                    | 0.12 | 0.05                    | 0.07 | 0.03                    | 0.09 | 0.55                    | 0.41 |
| DGM-b-3   | 121.2              | -0.07                   | 0.12 | -0.23                   | 0.09 | -0.31                   | 0.11 | -0.49                   | 0.12 | -1.02                   | 0.41 | 0.06                    | 0.12 | 0.01                    | 0.07 | 0.06                    | 0.09 | -0.06                   | 0.41 |
| DGM-a-4   | 87.8               | -0.10                   | 0.08 | -0.24                   | 0.09 | -0.44                   | 0.12 | -0.56                   | 0.12 | -0.77                   | 0.29 | 0.05                    | 0.08 | 0.05                    | 0.07 | -0.01                   | 0.09 | 0.08                    | 0.45 |
| DGM-b-4   | 99.3               | -0.07                   | 0.08 | -0.23                   | 0.09 | -0.41                   | 0.12 | -0.47                   | 0.12 | -0.90                   | 0.29 | 0.04                    | 0.08 | 0.01                    | 0.07 | -0.05                   | 0.09 | -0.20                   | 0.45 |
| DGM-a-5   | 89.0               | -0.14                   | 0.12 | -0.22                   | 0.09 | -0.33                   | 0.11 | -0.39                   | 0.12 | -0.39                   | 0.41 | -0.04                   | 0.12 | -0.02                   | 0.07 | -0.03                   | 0.09 | 0.43                    | 0.41 |
| DGM-b-5   | 91.5               | -0.19                   | 0.08 | -0.19                   | 0.09 | -0.43                   | 0.11 | -0.47                   | 0.12 | -0.47                   | 0.29 | -0.07                   | 0.09 | 0.04                    | 0.07 | -0.08                   | 0.11 | 0.07                    | 0.24 |
| RHg-a-1   | 246.1              | -0.24                   | 0.04 | -0.53                   | 0.10 | -0.72                   | 0.06 | -1.11                   | 0.10 | -1.60                   | 0.27 | 0.04                    | 0.05 | 0.03                    | 0.06 | 0.11                    | 0.07 | 0.05                    | 0.18 |
| RHg-b-2   | 257.9              | -0.27                   | 0.04 | -0.53                   | 0.10 | -0.77                   | 0.06 | -1.14                   | 0.10 | -1.74                   | 0.27 | 0.02                    | 0.05 | 0.04                    | 0.06 | 0.09                    | 0.07 | -0.04                   | 0.18 |
| RHg-a-2   | 206.6              | -0.20                   | 0.08 | -0.44                   | 0.04 | -0.73                   | 0.06 | -0.97                   | 0.10 | -1.62                   | 0.20 | 0.05                    | 0.10 | 0.05                    | 0.08 | 0.00                    | 0.05 | -0.17                   | 0.15 |
| RHg-b-2   | 184.3              | -0.24                   | 0.08 | -0.51                   | 0.04 | -0.73                   | 0.06 | -1.07                   | 0.10 | -1.69                   | 0.20 | 0.03                    | 0.10 | 0.03                    | 0.08 | 0.08                    | 0.05 | -0.09                   | 0.15 |
| RHg-a-3   | 174.8              | -0.20                   | 0.08 | -0.43                   | 0.04 | -0.55                   | 0.06 | -0.82                   | 0.10 | -1.23                   | 0.20 | 0.01                    | 0.10 | -0.02                   | 0.08 | 0.06                    | 0.05 | -0.02                   | 0.15 |
| RHg-b-3   | 201.5              | -0.25                   | 0.08 | -0.45                   | 0.04 | -0.60                   | 0.06 | -0.91                   | 0.10 | -1.35                   | 0.20 | -0.02                   | 0.10 | 0.01                    | 0.08 | 0.08                    | 0.05 | 0.00                    | 0.15 |
| RHg-a-4   | 209.6              | -0.24                   | 0.03 | -0.58                   | 0.03 | -0.83                   | 0.06 | -1.19                   | 0.13 | -1.94                   | 0.20 | 0.06                    | 0.05 | 0.02                    | 0.06 | 0.06                    | 0.06 | -0.16                   | 0.15 |
| RHg-b-4   | 228.0              | -0.25                   | 0.03 | -0.55                   | 0.03 | -0.76                   | 0.06 | -1.16                   | 0.13 | -1.58                   | 0.20 | 0.04                    | 0.05 | 0.03                    | 0.06 | 0.12                    | 0.06 | 0.15                    | 0.15 |
| RHg-a-5   | 265.3              | -0.17                   | 0.06 | -0.40                   | 0.02 | -0.56                   | 0.06 | -0.80                   | 0.10 | -1.23                   | 0.20 | 0.03                    | 0.05 | 0.01                    | 0.06 | 0.04                    | 0.06 | -0.03                   | 0.19 |
| RHg-b-5   | 241.6              | -0.20                   | 0.06 | -0.43                   | 0.02 | -0.64                   | 0.06 | -0.88                   | 0.10 | -1.32                   | 0.20 | 0.03                    | 0.05 | 0.02                    | 0.06 | 0.02                    | 0.06 | 0.00                    | 0.19 |
| RHg-a-6   | 211.3              | -0.06                   | 0.05 | -0.34                   | 0.02 | -0.56                   | 0.06 | -0.69                   | 0.10 | -1.20                   | 0.20 | 0.11                    | 0.05 | 0.01                    | 0.06 | -0.04                   | 0.06 | -0.17                   | 0.19 |
| RHg-b-6   | 213.7              | -0.02                   | 0.05 | -0.31                   | 0.02 | -0.51                   | 0.06 | -0.64                   | 0.10 | -1.14                   | 0.27 | 0.14                    | 0.05 | 0.01                    | 0.06 | -0.03                   | 0.06 | -0.18                   | 0.15 |

**Table S4** Concentrations and isotopic compositions of dissolve mercury (DHg) in HFL.

| Sample ID | Hg concentration   | $\delta^{199}\text{Hg}$ | 2sd  | $\delta^{200}\text{Hg}$ | 2sd  | $\delta^{201}\text{Hg}$ | 2sd  | $\delta^{202}\text{Hg}$ | 2sd  | $\delta^{204}\text{Hg}$ | 2sd  | $\Delta^{199}\text{Hg}$ | 2sd  | $\Delta^{200}\text{Hg}$ | 2sd  | $\Delta^{201}\text{Hg}$ | 2sd  | $\Delta^{204}\text{Hg}$ | 2sd  |
|-----------|--------------------|-------------------------|------|-------------------------|------|-------------------------|------|-------------------------|------|-------------------------|------|-------------------------|------|-------------------------|------|-------------------------|------|-------------------------|------|
|           | ng L <sup>-1</sup> | (‰)                     |      | (‰)                     |      | (‰)                     |      | (‰)                     |      | (‰)                     |      | (‰)                     |      | (‰)                     |      | (‰)                     |      | (‰)                     |      |
| DHg-1     | 1.15               | -0.13                   | 0.05 | -0.49                   | 0.08 | -0.71                   | 0.05 | -1.06                   | 0.10 | -1.67                   | 0.29 | 0.14                    | 0.05 | 0.04                    | 0.06 | 0.09                    | 0.05 | -0.09                   | 0.19 |
| DHg-2     | 1.23               | -0.15                   | 0.05 | -0.31                   | 0.08 | -0.67                   | 0.05 | -0.91                   | 0.10 | -1.46                   | 0.14 | 0.08                    | 0.05 | 0.14                    | 0.06 | 0.01                    | 0.05 | -0.10                   | 0.15 |
| DHg-3     | 2.15               | 0.00                    | 0.05 | -0.38                   | 0.08 | -0.40                   | 0.11 | -0.79                   | 0.10 | -1.38                   | 0.27 | 0.20                    | 0.05 | 0.02                    | 0.06 | 0.19                    | 0.05 | -0.19                   | 0.11 |
| DHg-4     | 1.58               | -0.03                   | 0.05 | -0.45                   | 0.08 | -0.58                   | 0.10 | -0.90                   | 0.10 | -1.36                   | 0.14 | 0.20                    | 0.05 | 0.00                    | 0.06 | 0.09                    | 0.05 | -0.02                   | 0.11 |

### Text S1 Instrumental conditions of CVAFS and CV-MC-ICP-MS

Hg concentrations in the acid-trapping solutions were measured by the Cold Vapor Atomic Fluorescence Spectrometry (CVAFS).<sup>1</sup> The detection limit of CVAFS for Hg has been determined to be 0.2 ng L<sup>-1</sup>. Before the analysis of Hg, reagent materials and containers were carefully cleaned to eliminate possible contaminations.<sup>1</sup> Hg concentrations were calculated on basis of the standard curve determined by reducing a known amount of 3133 Hg standard (10-1000pg) with SnCl<sub>2</sub> solution (**Figure S1**). The samples were reduced with stannous chloride (SnCl<sub>2</sub>) to convert Hg(II) to gas Hg(0), which was then separated from the bubbler by purging with argon gas and collected onto a gold trap. Hg mass on gold trap was thermally desorbed and subsequently detected by CVAFS.<sup>1</sup>

**Figure S1** Standard curve of the CVAFS, Tekran 2500

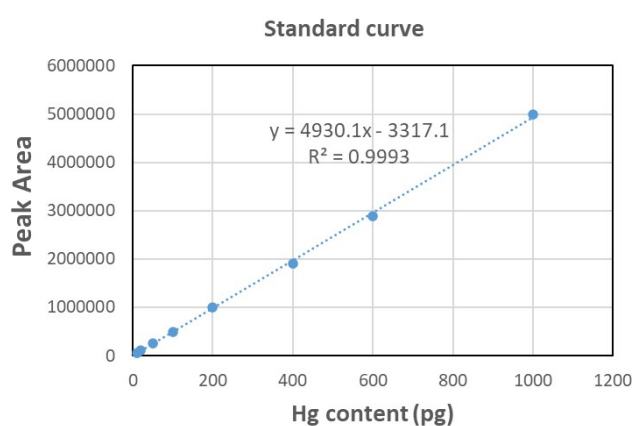

Prior to CV-MC-ICP-MS analysis, analytical grade acid (i.e., HNO<sub>3</sub>, HCl), Mill-Q water and high-purity argon were prepared. Hg in trapping solutions were diluted to the concentration matching that of the NIST 3133 Hg standards bracketing solution (differences less than 10%).<sup>2</sup> To minimize risks of the cross-contamination between the samples and Hg standard, a 10% HNO<sub>3</sub> (V/V) blank solution was used to rinse the cold vapor generation system to eliminate memory effects. The Hg standard (NIST SRM 3133) and thallium standard solutions (SRM 997) were diluted to concentrations of 1.0 ng Hg mL<sup>-1</sup> and 20 ng Tl mL<sup>-1</sup>, respectively, using 10% HCl (V/V) and 10% (V/V) HNO<sub>3</sub>. Instrumental mass bias was corrected using certified Tl isotope standard introduced as aerosol and strict standard-sample-standard bracketing with 3133 Hg standard solution. Besides, acquisition parameters should be optimized to get the best internal precision on all Hg ratios (**Table S5**).<sup>3-5</sup>

**Table S5** Instrumental operating conditions and parameters of CV-MC-ICP-MS

| Plasma parameters                        |                                  |
|------------------------------------------|----------------------------------|
| Nebulizer gas                            | 27.0 - 34.0 mL min <sup>-1</sup> |
| Mix gas                                  | 0.07 - 0.13 mL min <sup>-1</sup> |
| RF Power                                 | 1300 W                           |
| <b>Apex system</b> : Heater temperature  | 100°C                            |
| <b>Apex system</b> : Chiller temperature | 2 °C                             |

|                                                           |                                  |
|-----------------------------------------------------------|----------------------------------|
| <b>cold vapor generation system:</b> Solution uptake rate | 0.75 ml min <sup>-1</sup>        |
| Sensitivity for <sup>202</sup> Hg                         | 1.2-1.4 V (ng mL <sup>-1</sup> ) |

**Reference:**

1. U. EPA, Method 1631, Revision E:, *In US Environmental Protection Agency Washington, DC*, 2002.
2. B. A. Bergquist and J. D. Blum, *Science*, 2007, **318**, 417-420.
3. R. S. Yin, X. B. Feng, D. Foucher, W. F. Shi, Z. Q. Zhao and J. Wang, *Chinese J Anal Chem*, 2010, **38**, 929-934.
4. D. Foucher and H. Hintelmann, *Anal Bioanal Chem*, 2006, **384**, 1470-1478.
5. J. B. Chen, H. Hintelmann and B. Dimock, *J Anal Atom Spectrom*, 2010, **25**, 1402-1409.
